# Supplementary material for: Spontaneous Cultural Conversion Rate of Mycobacterium avium Complex Pulmonary Disease Based on Baces Severity
Source: Preprints.org preprint supplement (doi:10.20944/preprints202310.1983.v1), 2023-10-31
Supplement: Supplementary file 1 [file supplementary]

## Supplementary material

### **Spontaneous Cultural Conversion Rate of Mycobacterium avium complex pulmonary disease**

#### **Based on BACES severity**

Bo-Guen Kim<sup>1#</sup>, Jin Young Yu<sup>2#</sup>, Byung Woo Jhun<sup>3</sup>

<sup>1</sup>Division of Pulmonary Medicine and Allergy, Department of Internal Medicine, Hanyang University College of Medicine, Seoul, South Korea.

<sup>2</sup>Department of Medicine, Samsung Medical Center, Sungkyunkwan University School of Medicine, Seoul, South Korea

<sup>3</sup>Division of Pulmonary and Critical Care Medicine, Department of Medicine, Samsung Medical Center, Sungkyunkwan University School of Medicine, Seoul, South Korea.

<sup>#</sup>Bo-Guen Kim and Jin Young Yu contributed equally to this work

**Correspondence:** Byung Woo Jhun, Division of Pulmonary and Critical Care Medicine, Department of Medicine, Samsung Medical Center, Sungkyunkwan University School of Medicine, 81 Irwon-ro, Gangnam-gu, Seoul 06351, Republic of Korea. E-mail: byungwoo.jhun@gmail.com

**Supplementary figure 1.** Cumulative culture conversion rate in all study patients according to BACES severity

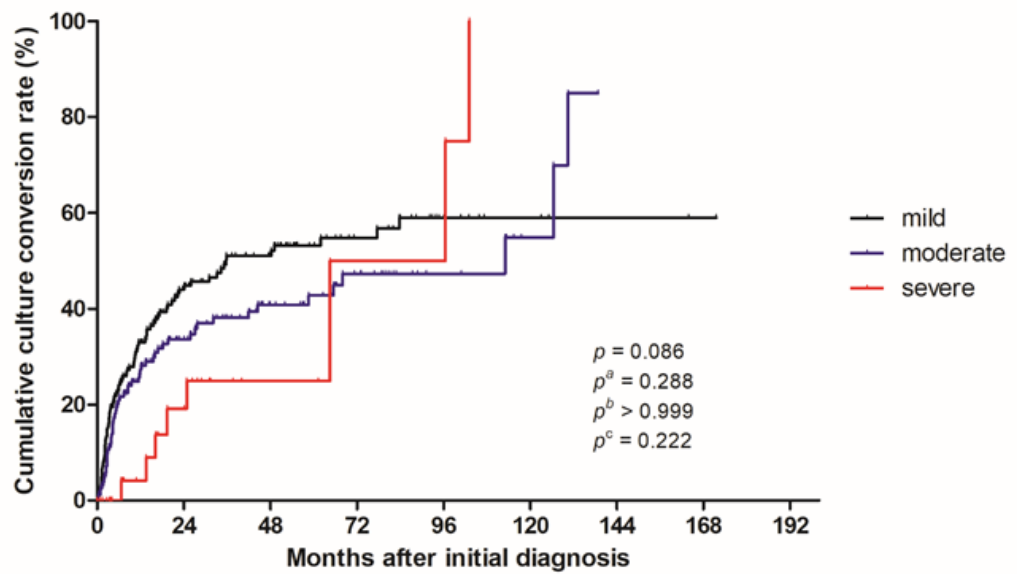

**No. at risk**

|                       |     |    |    |    |    |   |   |   |
|-----------------------|-----|----|----|----|----|---|---|---|
| <b>BACES Mild</b>     | 183 | 69 | 46 | 23 | 11 | 4 | 2 | 1 |
| <b>BACES Moderate</b> | 157 | 64 | 35 | 21 | 8  | 3 | 0 | 0 |
| <b>BACES Severe</b>   | 33  | 15 | 4  | 2  | 2  | 0 | 0 | 0 |
